# Supplementary material for: A proximity-labeling proteomic approach to investigate invadopodia molecular landscape in breast cancer cells
Source: PubMed Central journal article supplement (PMC7176661; doi:10.1038/s41598-020-63926-4), 2020-04-22

## Supplementary Information

### **A proximity-labeling proteomic approach to investigate invadopodia molecular landscape in breast cancer cells**

Sylvie Thuault<sup>1\*</sup>, Claire Mamelonet<sup>1</sup>, Joëlle Salameh<sup>1,a</sup>, Kevin Ostacolo<sup>1,b</sup>, Brice Chanez<sup>1,c</sup>, Danièle Salaün<sup>1</sup>, Emilie Baudelet<sup>2</sup>, Stéphane Audebert<sup>2</sup>, Luc Camoin<sup>2</sup> and Ali Badache<sup>1</sup>

<sup>1</sup>Centre de Recherche en Cancérologie de Marseille (CRCM), Aix-Marseille Univ, INSERM, Institut Paoli-Calmettes, CNRS, Marseille, France

<sup>2</sup>CRCM, Marseille Proteomics, Aix-Marseille Univ, INSERM, CNRS, Institut Paoli-Calmettes, Marseille, France

#### Present addresses:

<sup>a</sup> Joëlle Salameh: INSERM UMR-S 1193, Univ. Paris-Sud, Université Paris-Saclay, Châtenay-Malabry, France

<sup>b</sup> Kevin Ostacolo: Department of Biochemistry and Molecular Biology, Biomedical Center, Faculty of Medicine, University of Iceland, Reykjavik, Iceland

<sup>c</sup> Brice Chanez: Institut Paoli-Calmettes, Department of Medical Oncology, Marseille, France

**Supplementary Table S1: List of proteins biotinylated by Tks5-BirA\* fusion protein.** Protein list results from the comparison of proteins biotinylated by Tks5-BirA\* fusion protein with proteins biotinylated by BirA\* control protein, after their isolation by affinity capture and identification by mass spectrometry. Proteins listed here correspond to proteins above the full line indicative of protein hits obtained at a pFDR of 1% on Fig.3A volcano plot. For each protein their link to invadosome, their implication in actin cytoskeleton organization and their link to cancer invasion and metastasis have been analyzed, by comparison to the list of proteins obtained for "invadosome" query by GLAD4U literature mining and manual literature searching. The presence of Proline-rich regions and SH3 domains determined by InterPro site is also referenced. Data result from two different experiments processed three times.

**Supplementary Table S2: List of proteins biotinylated by  $\Delta$ PX-Tks5-BirA\* fusion protein.** Protein list results from the comparison of proteins biotinylated by  $\Delta$ PX-Tks5-BirA\* fusion protein with proteins biotinylated by BirA\* control protein, after their isolation by affinity capture and identification by mass spectrometry. Proteins listed here correspond to proteins hits obtained at a pFDR of 1%. Data result from two different experiments processed three times.

**Supplementary Table S3: Tables listing proteins biotinylated by both Tks5-BirA\* and  $\Delta$ PX-Tks5-BirA\* (left), only by Tks5-BirA\* (middle) and only by  $\Delta$ PX-Tks5-BirA\* (right) fusion proteins.** Proteins listed here correspond to proteins highlighted in red, blue and green, respectively, on Fig.4A volcano plot. Tables result from the intersection of Tks5-BirA\* (Supplementary Table S1) and  $\Delta$ PX-Tks5-BirA\* (Supplementary Table S2) close neighbors. Proteins biotinylated by both Tks5-BirA\* fusion proteins correspond to proteins identified as different (pFDR of 1%) in each of the fusion protein relative to BirA\* control condition. Proteins designed as Tks5-BirA\* or  $\Delta$ PX-Tks5-BirA\* only correspond to proteins different (pFDR of 1%) only in the fusion protein addressed relative to BirA\* control condition. For each protein, its difference of abundance in Tks5-BirA\* fusion proteins *versus* BirA\* conditions is indicated and its difference of abundance in Tks5-BirA\* *versus*  $\Delta$ PX-Tks5-BirA\* conditions has been calculated and is reported in the third column. <sup>(1)</sup> Grey-colored columns correspond to proteins with no significant differential of abundance in the Tks5-BirA\* fusion protein analyzed relative to BirA\* control condition.

**Supplementary Table S4:** Primers pairs used for amplifying Tks5 and  $\Delta$ PX-Tks5 sequences.

**Supplementary Figure 1: (A) Analysis of the efficiency of Tks5 knockdown by western blotting.** MDA-MB-231 cells stably expressing BirA\*, Tks5-BirA\* or  $\Delta$ PX-Tks5-BirA\* were transfected with a siRNA directed against the 3'UTR of Tks5 mRNA (siTks5) or with a control siRNA directed against LacZ mRNA (siLacZ) for 36 h. An anti-Tks5 antibody was used to analyze Tks5 levels.  $\alpha$ -Tubulin was used as a loading control. The efficiency of Tks5 knockdown is clearly observed in BirA\* expressing cells. In cells expressing Tks5-BirA\* fusion proteins, degradation products coincided with the size of endogenous Tks5 making it difficult to visualize the efficiency of Tks5 knock-down in these cells. **(B) Analysis of the biotinylation of newly identified Tks5 neighbors in presence or absence of endogenous Tks5.** MDA-MB-231 cells stably expressing BirA\*, Tks5-BirA\* or  $\Delta$ PX-Tks5-BirA\* were transfected with a siRNA against the 3'UTR of Tks5 mRNA (siTks5) or with a siRNA control directed against LacZ mRNA (siLacZ) for 36 h and then seeded on gelatin in presence of biotin for 16 h. After cell lysis, biotinylated proteins were isolated by affinity capture using avidin-coated beads. The presence of proteins of interest was assessed in whole cell extract (WCE) or after avidin-based pulldown by western blotting with specific antibodies. Knock-down of endogenous Tks5 had no impact on the efficiency of Tks5-BirA fusion proteins to biotinylate newly identified Tks5 close neighbors. Full-length blots are presented in Supplementary Figure 2.

**Supplementary Figure 2:** Full-size blots/gels from Figures 1C, 2B-D, 4B and Supplementary Figure 1.



**Supplementary Table S2: List of proteins biotinylated by ΔPX-Tks5-BirA\* fusion protein.**

Protein list results from the comparison of proteins biotinylated by ΔPX-Tks5-BirA\* fusion protein with proteins biotinylated by BirA\* control protein, after their isolation by affinity capture and identification by mass spectrometry. Proteins listed here correspond to proteins hits obtained at a pFDR of 1%. Data result from two different experiments processed three times.

| Protein IDs   | Protein names                                                                                 | Gene names | Peptides | Sequence coverage [%] | Mol. weight [kDa] | p-value (-Log10) | Differential (Log2) ΔPX-Tks5-BirA* versus BirA* |
|---------------|-----------------------------------------------------------------------------------------------|------------|----------|-----------------------|-------------------|------------------|-------------------------------------------------|
| Q5TCZ1;A1X283 | SH3 and PX domain-containing protein 2A                                                       | SH3PXD2A   | 120      | 81                    | 125.29            | 14.00469377      | 16.79133638                                     |
| Q14247        | Src substrate cortactin                                                                       | CTTN       | 28       | 50.5                  | 61.585            | 10.5672796       | 7.658259074                                     |
| P49959        | Double-strand break repair protein MRE11A                                                     | MRE11A     | 18       | 35.9                  | 80.592            | 7.46094941       | 7.174569766                                     |
| Q9Y5K6        | CD2-associated protein                                                                        | CD2AP      | 13       | 24.3                  | 71.45             | 7.966618016      | 6.196915785                                     |
| Q96RU3        | Formin-binding protein 1                                                                      | FNBP1      | 6        | 12.5                  | 71.306            | 4.670416997      | 5.608518759                                     |
| O60732        | Melanoma-associated antigen C1                                                                | MAGEC1     | 6        | 8.5                   | 123.64            | 5.166906572      | 5.325631301                                     |
| Q14195        | Dihydropyrimidinase-related protein 3                                                         | DPYSL3     | 12       | 30.4                  | 61.963            | 4.583939755      | 5.090364933                                     |
| Q86T24        | Transcriptional regulator Kaiso                                                               | ZBTB33     | 3        | 8.8                   | 74.484            | 7.226418622      | 4.578668594                                     |
| Q969G3        | SWI/SNF-related matrix-associated actin-dependent regulator of chromatin subfamily E member 1 | SMARCE1    | 2        | 8                     | 46.649            | 2.205633135      | 4.180418491                                     |
| Q15652        | Probable JmjC domain-containing histone demethylation protein 2C                              | JMJD1C     | 3        | 1.8                   | 284.52            | 5.743897208      | 4.147589048                                     |
| Q9Y6M1        | Insulin-like growth factor 2 mRNA-binding protein 2                                           | IGF2BP2    | 3        | 8.5                   | 66.121            | 5.538307203      | 3.866715272                                     |
| Q96EB1        | Elongator complex protein 4                                                                   | ELP4       | 6        | 24.1                  | 46.587            | 8.216873652      | 3.530961037                                     |
| O00151        | PDZ and LIM domain protein 1                                                                  | PDLIM1     | 4        | 27.7                  | 36.071            | 3.974932048      | 3.492241383                                     |
| Q9UKK9        | ADP-sugar pyrophosphatase                                                                     | NUDT5      | 4        | 23.3                  | 24.327            | 4.395425637      | 3.363261541                                     |
| Q8TE02        | Elongator complex protein 5                                                                   | ELP5       | 5        | 24.1                  | 34.841            | 3.549250869      | 3.296580474                                     |
| P50479        | PDZ and LIM domain protein 4                                                                  | PDLIM4     | 2        | 10.6                  | 35.398            | 4.918884984      | 3.1442132                                       |
| Q726K5        | Arpin                                                                                         | ARPIN      | 1        | 5.3                   | 24.943            | 5.78745232       | 3.105995337                                     |
| P31946        | 14-3-3 protein beta/alpha;14-3-3 protein beta/alpha, N-terminally processed                   | YWHAH      | 6        | 40.7                  | 28.082            | 3.102797521      | 2.770226796                                     |
| Q5T0N5        | Formin-binding protein 1-like                                                                 | FNBP1L     | 3        | 8.6                   | 70.065            | 3.163598993      | 2.732745806                                     |
| P61981        | 14-3-3 protein gamma;14-3-3 protein gamma, N-terminally processed                             | YWHAG      | 5        | 32.4                  | 28.302            | 3.841400861      | 2.722501755                                     |
| P27816        | Microtubule-associated protein 4                                                              | MAP4       | 16       | 20.4                  | 121               | 6.926183764      | 2.682752927                                     |
| Q9NS25        | Sperm protein associated with the nucleus on the X chromosome B/F                             | SPANXB1    | 2        | 27.2                  | 11.84             | 5.73212081       | 2.642450651                                     |
| Q9NS26        | Sperm protein associated with the nucleus on the X chromosome A                               | SPANXA1    |          |                       |                   |                  |                                                 |
| Q07157        | Tight junction protein ZO-1                                                                   | TJP1       | 24       | 20.7                  | 195.46            | 8.285232815      | 2.545808792                                     |
| Q0PNE2        | Elongator complex protein 6                                                                   | ELP6       | 2        | 9.8                   | 29.793            | 2.754979228      | 2.469645182                                     |
| Q9Y4E8        | Ubiquitin carboxyl-terminal hydrolase 15                                                      | USP15      | 1        | 2.1                   | 112.42            | 3.096935139      | 2.253142675                                     |
| O43426        | Synaptojanin-1                                                                                | SYNJ1      | 2        | 3.1                   | 173.1             | 4.567370702      | 2.237295151                                     |
| P29401        | Transketolase                                                                                 | TKT        | 4        | 11.1                  | 67.877            | 2.172138733      | 2.136732419                                     |
| P55209        | Nucleosome assembly protein 1-like 1                                                          | NAP1L1     | 2        | 5.4                   | 45.374            | 3.424767194      | 2.123708725                                     |
| Q99733        | Nucleosome assembly protein 1-like 4                                                          | NAP1L4     |          |                       |                   |                  |                                                 |
| Q9HCN4        | GNP-loop GTPase 1                                                                             | GPN1       | 1        | 4.3                   | 41.74             | 3.390386248      | 2.03527228                                      |
| P23588        | Eukaryotic translation initiation factor 4B                                                   | EIF4B      | 2        | 6.2                   | 69.15             | 2.576545034      | 1.942392349                                     |
| O75815        | Breast cancer anti-estrogen resistance protein 3                                              | BCAR3      | 2        | 3.3                   | 92.565            | 2.435325241      | 1.941552321                                     |
| P62258        | 14-3-3 protein epsilon                                                                        | YWHAH      | 9        | 37.6                  | 29.174            | 7.019493727      | 1.934883118                                     |
| Q9UJU6        | Drebrin-like protein                                                                          | DBNL       | 1        | 2.6                   | 48.207            | 1.841725873      | 1.888232867                                     |
| Q9UDY2        | Tight junction protein ZO-2                                                                   | TJP2       | 14       | 17.2                  | 133.96            | 8.786069397      | 1.886053403                                     |
| Q9UPQ0        | LIM and calponin homology domains-containing protein 1                                        | LIMCH1     | 2        | 2.7                   | 121.87            | 4.156091474      | 1.855589549                                     |
| P40763        | Signal transducer and activator of transcription 3                                            | STAT3      | 1        | 3.4                   | 88.067            | 2.973856904      | 1.832819303                                     |
| Q13162        | Peroxisome oxidin-4                                                                           | PRDX4      | 2        | 8.1                   | 30.54             | 2.654100435      | 1.831843694                                     |
| Q9UHB6        | LIM domain and actin-binding protein 1                                                        | LIMA1      | 4        | 7.4                   | 85.225            | 3.11598462       | 1.791516304                                     |
| P0DMV9        | Heat shock 70 kDa protein 1B                                                                  | HSPA1B     | 37       | 70.2                  | 70.051            | 8.983589311      | 1.561729113                                     |
| P0DMV8        | Heat shock 70 kDa protein 1A                                                                  | HSPA1A     |          |                       |                   |                  |                                                 |
| P49023        | Paxillin                                                                                      | PXN        | 8        | 23.2                  | 64.505            | 5.453557229      | 1.528698921                                     |
| P63104        | 14-3-3 protein zeta/delta                                                                     | YWHAZ      | 10       | 45.3                  | 27.745            | 4.353593263      | 1.456914902                                     |
| P34931        | Heat shock 70 kDa protein 1-like                                                              | HSPA1L     | 15       | 29.8                  | 70.374            | 4.714809086      | 1.392109235                                     |
| O60711        | Leupaxin                                                                                      | LPXN       | 1        | 5.7                   | 43.332            | 4.515592353      | 1.385031064                                     |
| P49321        | Nuclear autoantigenic sperm protein                                                           | NASP       | 4        | 11.4                  | 85.237            | 6.546653084      | 1.354332606                                     |
| Q09666        | Neuroblast differentiation-associated protein AHNAK                                           | AHNAK      | 104      | 39.7                  | 629.09            | 6.490538917      | 1.249121666                                     |

**Supplementary Table S3: Tables listing proteins biotinylated by both Tks5-BirA\* and ΔPX-Tks5-BirA\* (left), only by Tks5-BirA\* (middle) and only by ΔPX-Tks5-BirA\* (right) fusion proteins.**

Proteins listed here correspond to proteins highlighted in red, blue and green, respectively, on Fig.4A volcano plot

Tables result from the intersection of Tks5-BirA\* (Supplementary Table S1) and ΔPX-Tks5-BirA\* (Supplementary Table S2) close neighbors.

Proteins biotinylated by both Tks5-BirA\* fusion proteins correspond to proteins identified as different (pFDR < 1%) in each of the fusion protein relative to BirA\* control condition.

Proteins designed as Tks5-BirA\* or ΔPX-Tks5-BirA\* only correspond to proteins different (pFDR < 1%) only in the fusion protein addressed relative to BirA\* control condition.

For each protein, its difference of abundance in Tks5-BirA\* fusion proteins versus BirA\* conditions is indicated, and its difference of abundance in Tks5-BirA\* versus ΔPX-Tks5-BirA\* conditions has been calculated and is reported in the third column.

<sup>(1)</sup> Grey-colored columns correspond to proteins with no significant differential of abundance in the Tks5-BirA\* fusion protein analyzed relative to BirA\* control condition.

| In both (27)    | Differential (Log2) Tks5- | Differential (Log2) ΔPX- | Differential (Log2) Tks5-   |
|-----------------|---------------------------|--------------------------|-----------------------------|
|                 | BirA* versus BirA*        | Tks5-BirA* versus BirA*  | BirA* versus ΔPX-Tks5-BirA* |
| MAP4            | 4.93                      | 2.68                     | 2.25                        |
| CD2AP           | 7.23                      | 6.20                     | 1.03                        |
| MRE11A          | 7.61                      | 7.17                     | 0.44                        |
| MAGEC1          | 5.63                      | 5.33                     | 0.31                        |
| SPANXA1/SPANXB1 | 2.94                      | 2.64                     | 0.30                        |
| DBNL            | 2.13                      | 1.89                     | 0.24                        |
| PRDX4           | 1.87                      | 1.83                     | 0.04                        |
| NASP            | 1.39                      | 1.35                     | 0.04                        |
| NAP1L1/NAP1L4   | 2.08                      | 2.12                     | -0.05                       |
| BCAR3           | 1.87                      | 1.94                     | -0.07                       |
| CTTN            | 7.52                      | 7.66                     | -0.14                       |
| SYNJ1           | 2.07                      | 2.24                     | -0.17                       |
| HSPA1A/HSPA1B   | 1.29                      | 1.56                     | -0.28                       |
| LIMCH1          | 1.58                      | 1.86                     | -0.28                       |
| ELP5            | 2.90                      | 3.30                     | -0.39                       |
| TJP1            | 2.10                      | 2.55                     | -0.44                       |
| TJP2            | 1.40                      | 1.89                     | -0.49                       |
| USP15           | 1.75                      | 2.25                     | -0.50                       |
| NUDT5           | 2.82                      | 3.36                     | -0.55                       |
| ELP6            | 1.78                      | 2.47                     | -0.69                       |
| ELP4            | 2.81                      | 3.53                     | -0.72                       |
| ARPN            | 2.35                      | 3.11                     | -0.76                       |
| PDLIM1          | 2.70                      | 3.49                     | -0.79                       |
| IGF2BP2         | 2.99                      | 3.87                     | -0.88                       |
| FNBP1           | 4.44                      | 5.61                     | -1.17                       |
| PDLIM4          | 1.87                      | 3.14                     | -1.28                       |
| DPYSL3          | 3.64                      | 5.09                     | -1.45                       |

| In Tks5-BirA* only (13) | Differential (Log2) Tks5- | Differential (Log2) ΔPX-               | Differential (Log2) Tks5-   |
|-------------------------|---------------------------|----------------------------------------|-----------------------------|
|                         | BirA* versus BirA*        | Tks5-BirA* versus BirA* <sup>(1)</sup> | BirA* versus ΔPX-Tks5-BirA* |
| RTN4                    | 7.34                      | 1.74                                   | 5.60                        |
| FGD1                    | 4.93                      | 0.00                                   | 4.93                        |
| SHC1                    | 3.88                      | 1.47                                   | 2.40                        |
| MIB1                    | 2.92                      | 2.64                                   | 0.27                        |
| ANTXR1                  | 2.78                      | 1.15                                   | 1.64                        |
| ADAM15                  | 2.63                      | -0.38                                  | 3.01                        |
| RAPH1                   | 2.17                      | 1.44                                   | 0.72                        |
| KIF2C                   | 2.00                      | 1.11                                   | 0.88                        |
| ARAF                    | 1.83                      | 1.22                                   | 0.61                        |
| PRPS2                   | 1.75                      | 1.30                                   | 0.45                        |
| EIF4A3                  | 1.74                      | -0.47                                  | 2.21                        |
| EIF2S3/EIF2S3L          | 1.52                      | 1.16                                   | 0.36                        |
| RPIA                    | 1.41                      | 1.10                                   | 0.31                        |

| In ΔPX-Tks5-BirA* only (17) | Differential (Log2) Tks5-         | Differential (Log2) ΔPX- | Differential (Log2) Tks5-   |
|-----------------------------|-----------------------------------|--------------------------|-----------------------------|
|                             | BirA* versus BirA* <sup>(1)</sup> | Tks5-BirA* versus BirA*  | BirA* versus ΔPX-Tks5-BirA* |
| ZBTB33                      | 0.86                              | 4.58                     | -3.72                       |
| SMARCE1                     | 0.00                              | 4.18                     | -4.18                       |
| JMJD1C                      | 1.13                              | 4.15                     | -3.02                       |
| YWHAB                       | 0.22                              | 2.77                     | -2.55                       |
| FNBP1L                      | 1.36                              | 2.73                     | -1.38                       |
| YWHAG                       | 0.22                              | 2.72                     | -2.50                       |
| TKT                         | 1.54                              | 2.14                     | -0.59                       |
| GPN1                        | 0.64                              | 2.04                     | -1.39                       |
| EIF4B                       | 1.51                              | 1.94                     | -0.43                       |
| YWHAE                       | 0.64                              | 1.93                     | -1.29                       |
| STAT3                       | 1.15                              | 1.83                     | -0.68                       |
| LIMA1                       | 1.31                              | 1.79                     | -0.48                       |
| PXN                         | 1.16                              | 1.53                     | -0.37                       |
| YWHAZ                       | 0.35                              | 1.46                     | -1.11                       |
| HSPA1L                      | 1.06                              | 1.39                     | -0.33                       |
| LPXN                        | 0.77                              | 1.39                     | -0.62                       |
| AHNAK                       | 1.18                              | 1.25                     | -0.07                       |

**Supplementary Table S4 : Primer pairs used for amplifying Tks5 and  $\Delta$ PX-Tks5 sequences**

| Name             | Sequence                                                            |
|------------------|---------------------------------------------------------------------|
| attB1-Nter Tks5  | 5'-GGGGACAAGTTTGTACAAAAAAGCAGGCTTCACCATGCTCGC CTA CTGCGTGCAGGATG-3' |
| attB1-delPX Tks5 | 5'-GGGGACAAGTTTGTACAAAAAAGCAGGCTTCACCATGGAGGC TCGACCCGAGGATGTC-3'   |
| attB2-Cter Tks5  | 5'-GGGGACCACTTTGTACAAGAAAGCTGGGTCGTTCTTTTCTCAAGGTAGTTGGAAG-3'       |

# Thuault et al., Supplementary Figure 1

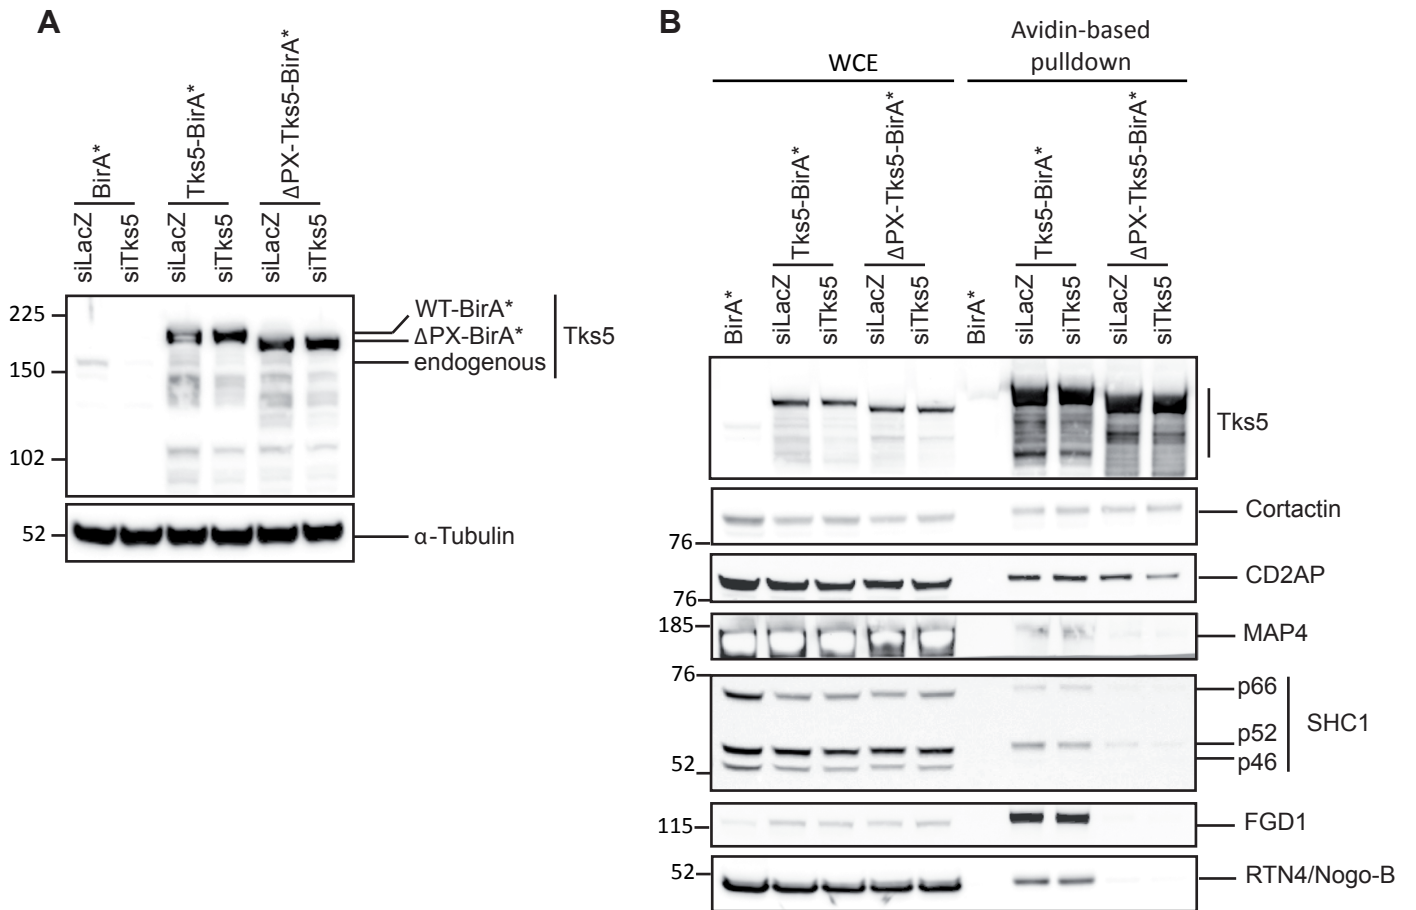

Figure 1C

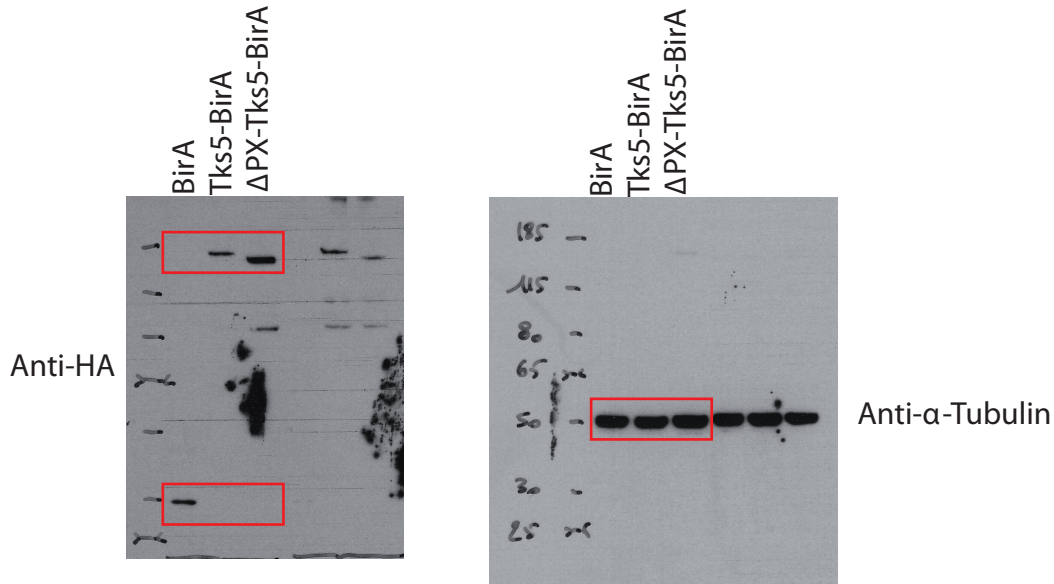

Figure 2B

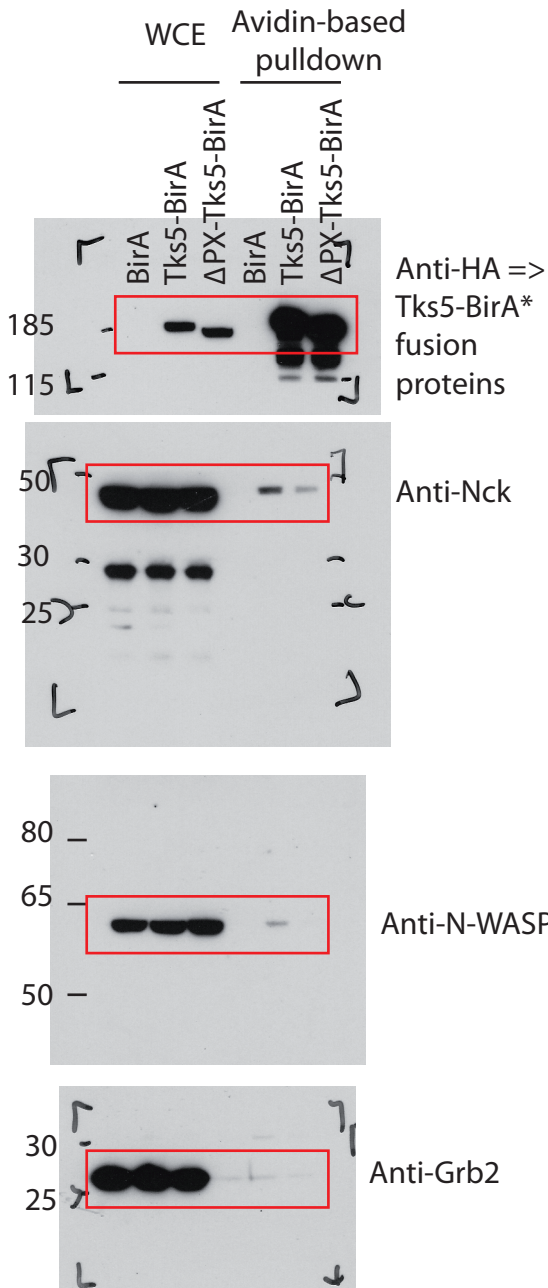

Figure 2C

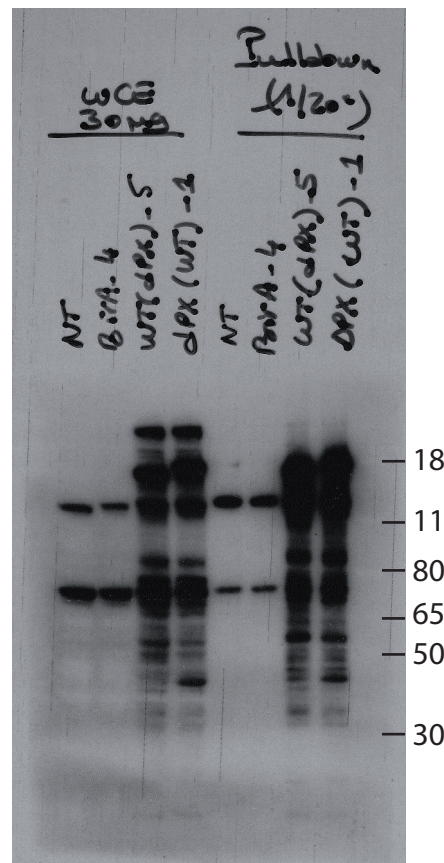

Figure 2D

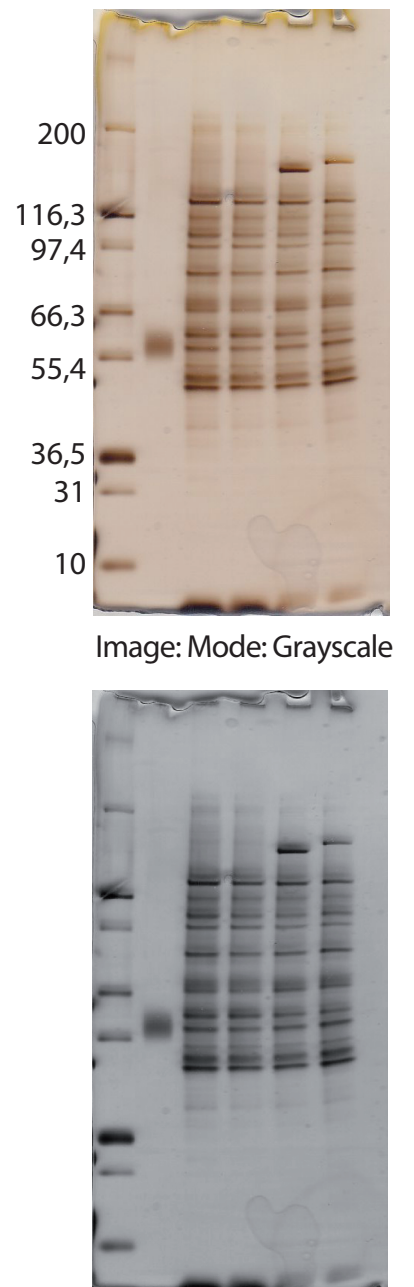



Figure 4B

5min exposition

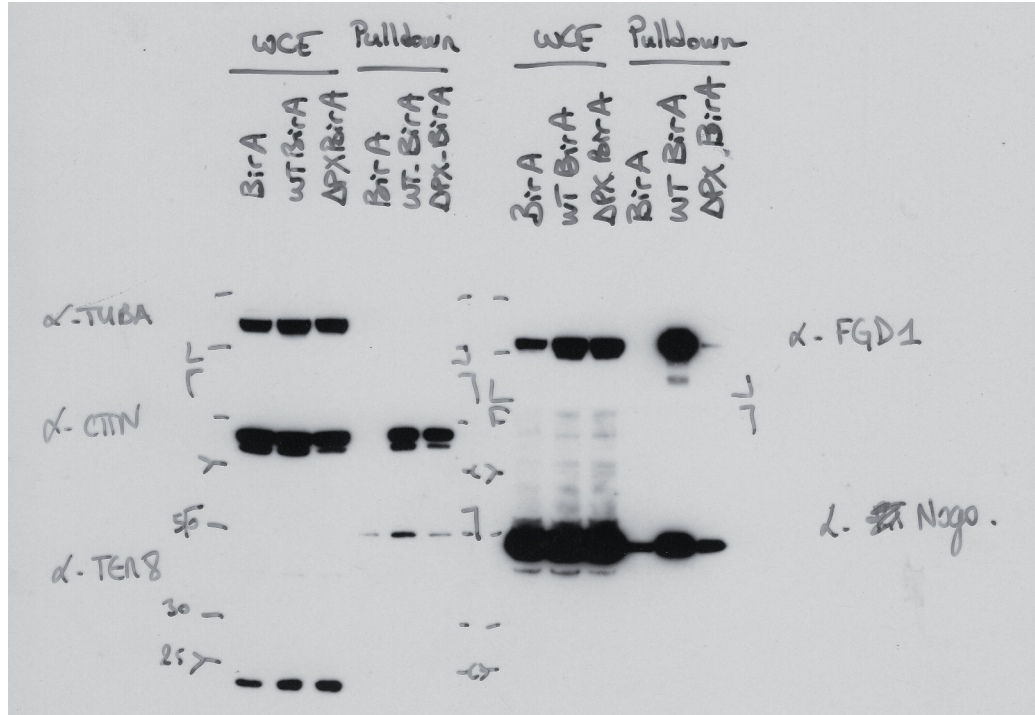

10sec exposition

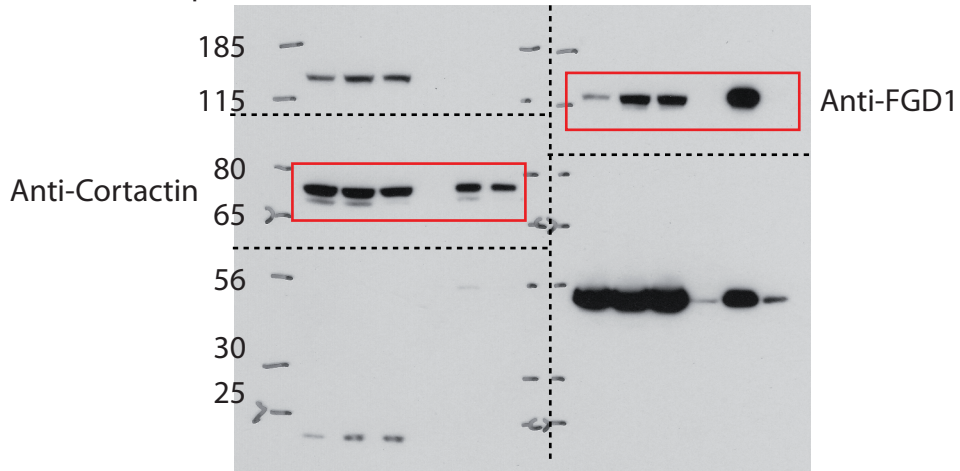

1sec exposition

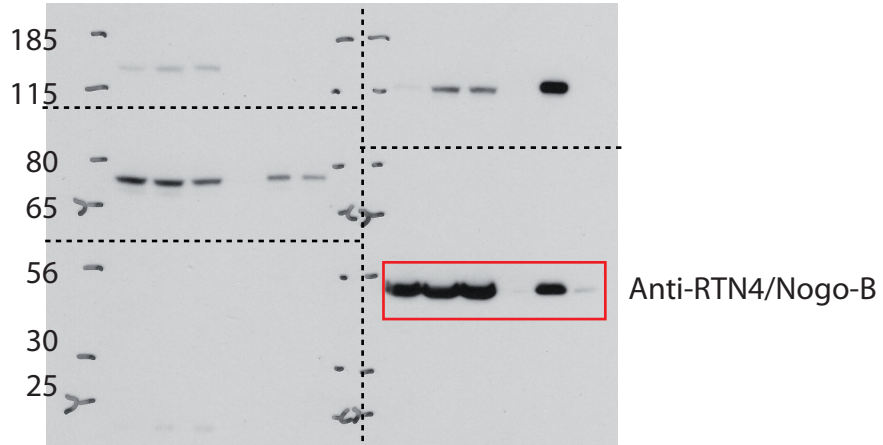

Figure 4B (continuation)

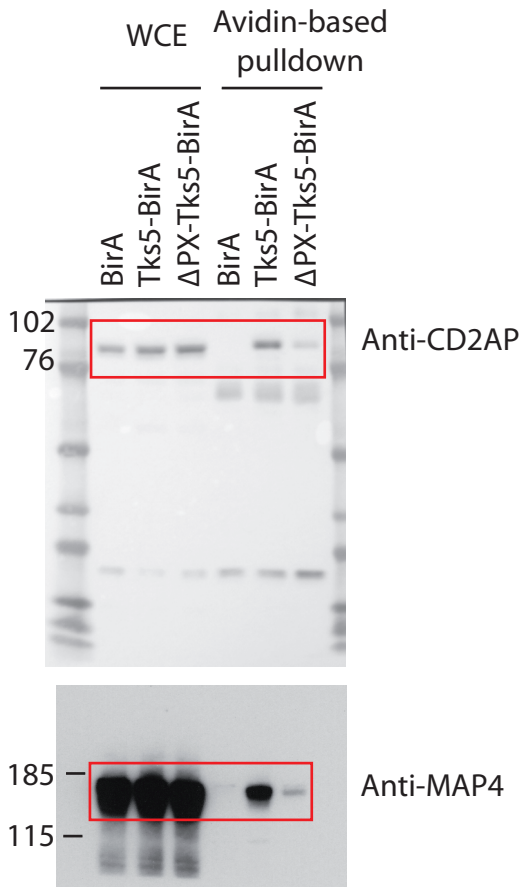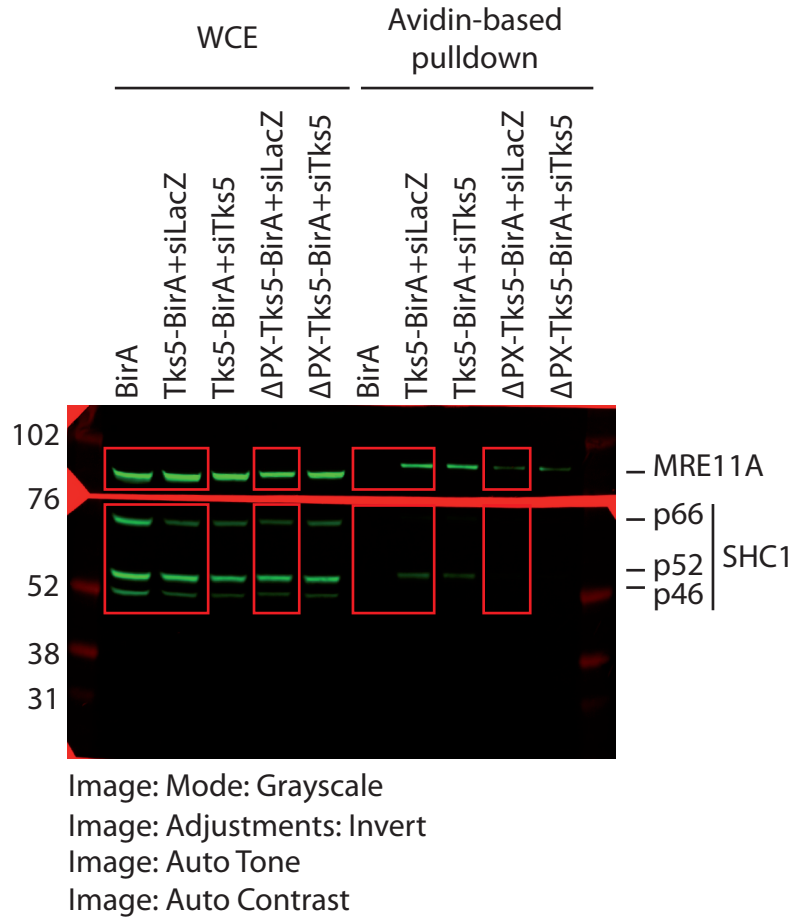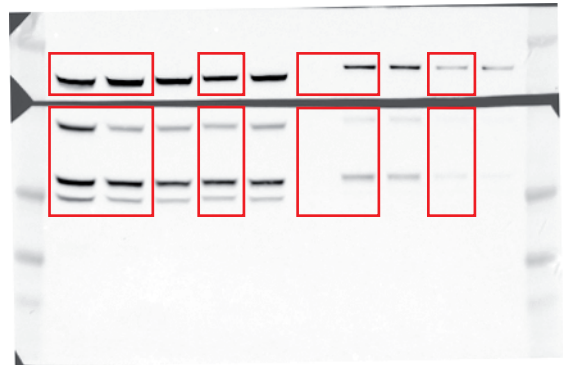

A

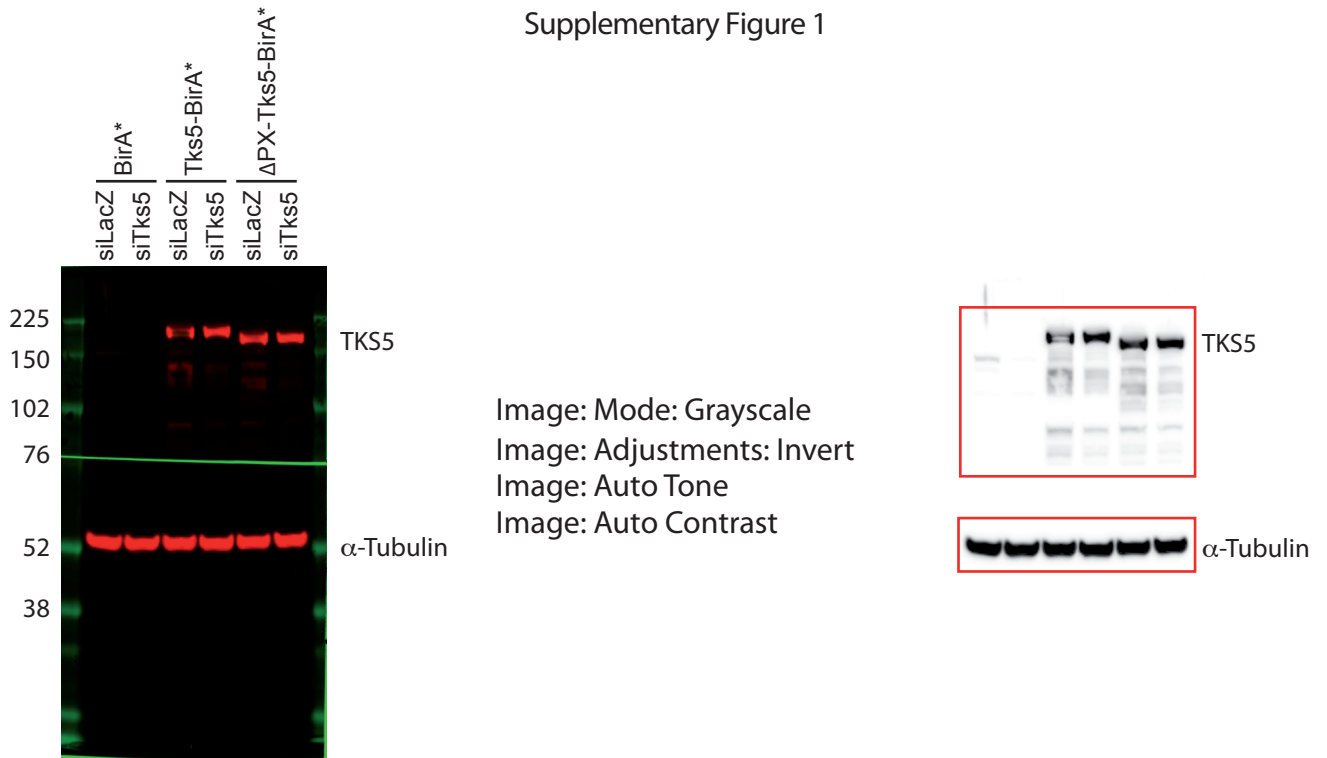

B

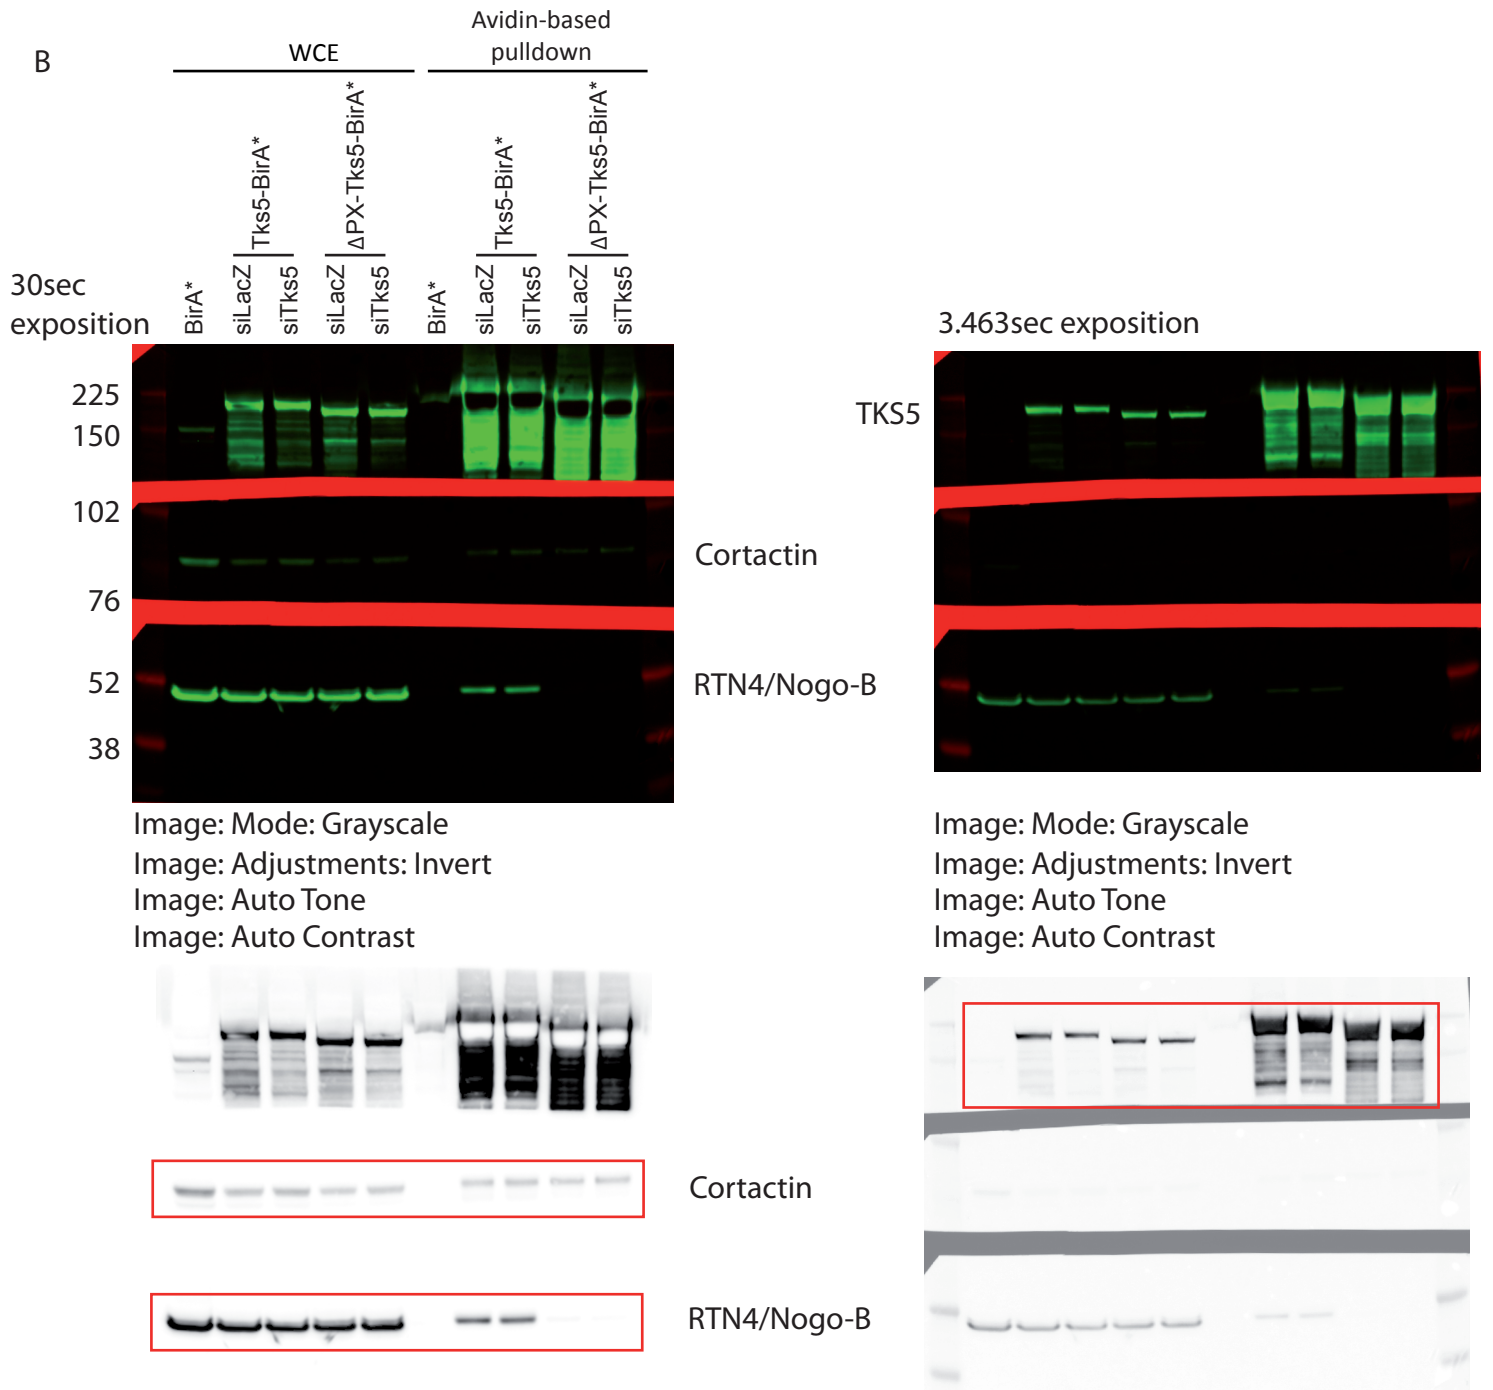

Supplementary Figure 1 (continuation)

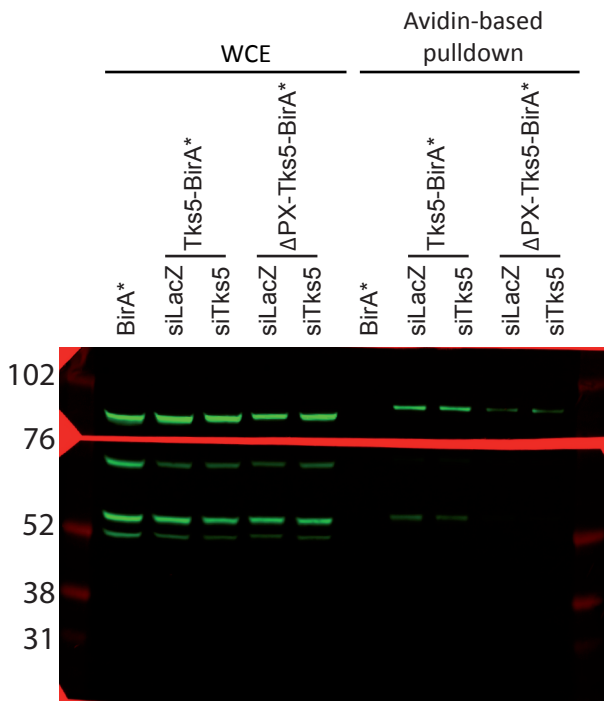

Image: Mode: Grayscale  
 Image: Adjustments: Invert  
 Image: Auto Tone  
 Image: Auto Contrast

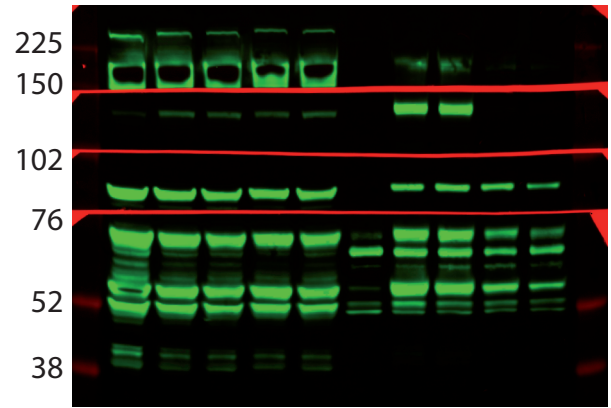

Image: Mode: Grayscale  
 Image: Adjustments: Invert  
 Image: Auto Tone  
 Image: Auto Contrast

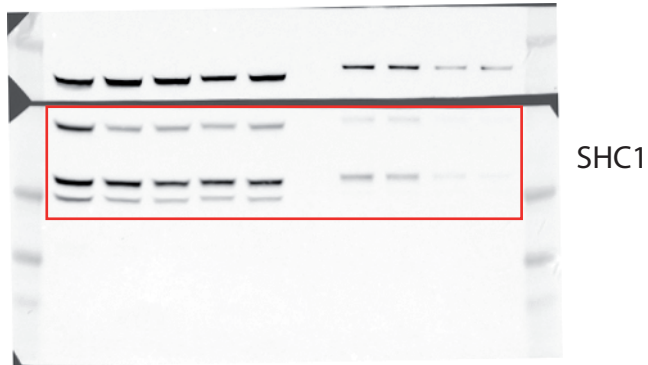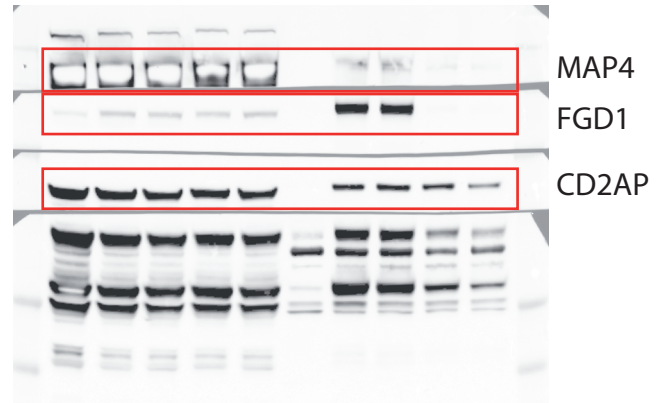

Supplement: 41598_2020_63926_MOESM1_ESM.pdf [file 41598_2020_63926_MOESM1_ESM.pdf]
